# Supplementary material for: First regioselective cyclometalation reactions of cobalt in arylketones: C–H versus C–F activation
Source: Royal Society of Chemistry journal article supplement (doi:10.1039/b813419g), 2008-01-01
Supplement: b813419g.pdf [file b813419g.pdf]

## Supporting Information

### Regioselective Cyclometalation Reactions of Cobalt in Arylketones: C-H versus C-F Activation

Sebnem Camadanli<sup>\*,a,b</sup>, Robert Beck,<sup>a</sup> Ulrich Flörke,<sup>c</sup> and Hans-Friedrich Klein<sup>a</sup>

[<sup>a</sup>] Dr. Sebnem Camadanli, Dr. Robert Beck, Prof. Dr. Hans-Friedrich Klein  
Eduard-Zintl-Institut für Anorganische und Physikalische Chemie  
Technische Universität Darmstadt,  
Petersenstraße 18, Darmstadt  
D-64287, Germany

[<sup>b</sup>] Present Address:  
Leibniz Institute for Surface Modification  
Permoserstrasse 15, Leipzig  
D-04318, Germany

[<sup>c</sup>] Anorganische und Analytische Chemie  
Universität Paderborn  
Warburger Strasse 100, Paderborn  
D-33098, Germany

**General Remarks.** All manipulations were done under an atmosphere of purified argon (BTS - Catalyst) by using standard vacuum techniques.<sup>1-2</sup> Solvents were dried according to known procedures and freshly distilled prior to use. Deuterated tetrahydrofuran were freeze-pump-thaw degassed, dried from sodium/potassium alloy and distilled. Purchased reagents were used without any further purification. Literature methods were applied for the preparation of  $[\text{CoCH}_3(\text{PMe}_3)_4]^3$  and  $\text{PMe}_3$ .<sup>4</sup>

Air-sensitive samples were provided in capillaries sealed under vacuum and were analyzed by H. Kolbe Microanalytical Laboratory, Mülheim/Ruhr. C, H, N analyses identification of contents of air stable substances were performed in the microanalysis laboratory of Clemens-Schöpf-Institut for Organic Chemistry and Biochemistry in TU-Darmstadt using Perkin-Elmer CHN 240 A and CHN 240 B devices. The melting and decomposition points were measured on a Büchi 510 Melting point apparatus and are uncorrected. Air-sensitives substances were sealed in capillaries under 1 bar of Argon.

IR spectra were obtained from as Nujol mulls between KBr plates using a Bruker FRA 106 spectrophotometer and recorded in the range 4000 - 400  $\text{cm}^{-1}$ .  $^1\text{H}$  and  $^{13}\text{C}$  NMR spectra (500 MHz and 125 MHz, respectively) were recorded on a Bruker ARX-300 or Bruker DRX 500 spectrometers at the Organic Chemistry Institute of TU Darmstadt,  $^{31}\text{P}$  NMR spectra (202 MHz) were recorded on a Bruker AM-200 instrument.  $^1\text{H}$  and  $^{13}\text{C}$  NMR chemical shifts were referenced to external TMS and  $^{31}\text{P}$  chemical shifts were referenced to external  $\text{H}_3\text{PO}_4$  85%.  $^{13}\text{C}$  and  $^{31}\text{P}$  resonances were obtained with broad-band proton decoupling. Magnetic susceptibility data were obtained by the Faraday method using a Cahn D 200 torsion balance (Bruker) at 1.5 Tesla. Crystallographic data were collected on STOE-IPDS (Eduard-Zintl Institute of TU-Darmstadt) and Bruker AXS SMART APEX CCD (University of Paderborn) diffractometer. Structures were solved by Direct and Patterson methods using SHELXTL program library.<sup>5</sup>

## Synthesis of [2-(Benzoyl- $\kappa\text{O}$ )phenyl- $\kappa\text{C}$ ]tris(trimethylphosphine)cobalt(I) – (1)

920 mg (2.43 mmol) of  $\text{CoCH}_3(\text{PMe}_3)_4$  in THF were combined with 443 mg (2.43 mmol) of benzophenone at  $-70\text{ }^\circ\text{C}$ . The mixture was warmed to  $20\text{ }^\circ\text{C}$  and kept stirring for 16 h. The volatiles were then removed in vacuo. The residue was extracted with pentane and combined solutions were cooled to afford brown crystals of **1** at  $4\text{ }^\circ\text{C}$ . Yield 924 mg (81%); m. p.  $111\text{--}113\text{ }^\circ\text{C}$ . IR (Nujol):  $\tilde{\nu} = 3057\text{ cm}^{-1}$  (v H–C=C);  $1582\text{ cm}^{-1}$  m (v C=C);  $1484\text{ cm}^{-1}$  m (v C=O),  $1422\text{ cm}^{-1}$  w ( $\delta_{\text{as}}\text{PCH}_3$ ),  $1273\text{ cm}^{-1}$  m ( $\delta_{\text{s}}\text{PCH}_3$ ),  $935\text{ cm}^{-1}$  vs ( $\rho_1\text{PCH}_3$ ),  $842\text{ cm}^{-1}$  m ( $\rho_2\text{PCH}_3$ ),  $753\text{ vw}$  ( $\gamma\text{C-H}_{\text{arom}}$ ),  $701\text{ cm}^{-1}$  m ( $\nu_{\text{as}}\text{PC}_3$ ),  $661\text{ cm}^{-1}$  vs ( $\nu_{\text{s}}\text{PC}_3$ ).  $^1\text{H NMR}$  (500 MHz, THF- $d_8$ , 300 K, ppm):  $\delta = 1.30$  (d,  $^2J_{\text{P,H}} = 6.5$  Hz, 27H,  $\text{PCH}_3$ ); 6.61 (dt,  $^4J_{\text{H,H}} = 0.8$  Hz,  $^3J_{\text{H,H}} = 7.8$  Hz, 1H, Ar–H); 7.12 (t,  $^3J_{\text{H,H}} = 7.8$  Hz, 2H, Ar–H); 7.33 (tt,  $^4J_{\text{H,H}} = 1.2$  Hz,  $^3J_{\text{H,H}} = 8.0$  Hz, 1H, Ar–H); 7.46 (dt,  $^4J_{\text{H,H}} = 0.9$  Hz,  $^3J_{\text{H,H}} = 7.4$  Hz, 1H, Ar–H); 8.11 (d,  $^3J_{\text{H,H}} = 8.1$  Hz, 2H, Ar–H); 8.19 (d<sub>br</sub>,  $^3J_{\text{H,H}} = 8.1$  Hz, 1H, Ar–H); 8.22 (d,  $^3J_{\text{H,H}} = 8.2$  Hz, 1H, Ar–H).  $^{13}\text{C}\{^1\text{H}\}$  NMR (125 MHz, THF- $d_8$ , 300 K, ppm):  $\delta = 21.3$  (m,  $\text{PCH}_3$ ); 118.3 (q,  $^4J_{\text{P,C}} = 4.6$  Hz, CH); 121.9 (s, CH); 122.6 (s, CH); 123.7 (d,  $^5J_{\text{P,C}} = 2.4$  Hz, CH); 124.2 (dd,  $^4J_{\text{P,C}} = 3.4$  Hz,  $^4J_{\text{P,C}} = 2.2$  Hz, CH); 130.4 (s, CH); 145.2 (q,  $^4J_{\text{P,C}} = 4.6$  Hz, C); 146.2 (s, C); 147.8 (q,  $^5J_{\text{P,C}} = 2.2$  Hz, CH); 170.8 (q,  $^3J_{\text{P,C}} = 11.8$  Hz; C=O), 173.9 (m, Co–C).  $^{31}\text{P}\{^1\text{H}\}$  NMR (202 MHz, THF- $d_8$ , 300 K, ppm):  $\delta = 5.1$  (s<sub>br</sub>,  $\text{PCH}_3$ ). Anal. Calcd. for  $\text{C}_{22}\text{H}_{36}\text{CoOP}_3$ : C 56.42; H 7.75; P 19.84. Found: C 56.95; H 7.53; P 20.68 %.

### Synthesis of [2-(Benzoyl- $\kappa\text{O}$ )benzyl- $\kappa\text{C}$ ]tris(trimethylphosphine)cobalt(I) - (2)

1.15 g (3.04 mmol) of  $\text{CoCH}_3(\text{PMe}_3)_4$  in THF were combined with 0.60 g (3.04 mmol) of benzylphenylketone at  $-70\text{ }^\circ\text{C}$ . The mixture was warmed to  $20\text{ }^\circ\text{C}$  and kept stirring for 16 h. The volatiles were then removed in vacuo. The residue was extracted with pentane and combined solutions were cooled to afford brown crystals of **2** at  $-27\text{ }^\circ\text{C}$ . Yield 970 mg (66 %); m. p.  $107\text{--}109\text{ }^\circ\text{C}$ . IR (Nujol):  $\tilde{\nu} = 3023\text{ cm}^{-1}$  m (v H–C=C),  $1547\text{ cm}^{-1}$  s (v C=C),  $1483\text{ cm}^{-1}$  m (v C=O),  $1421\text{ s}$  ( $\delta_{\text{as}}\text{PCH}_3$ ),  $1278\text{ cm}^{-1}$  m ( $\delta_{\text{s}}\text{PCH}_3$ ),  $937\text{ cm}^{-1}$  vs ( $\rho_1\text{PCH}_3$ );  $874\text{ cm}^{-1}$  m ( $\rho_2\text{PCH}_3$ ),  $748\text{ cm}^{-1}$  ( $\gamma\text{C-H}_{\text{arom}}$ ),  $698\text{ cm}^{-1}$  vs ( $\nu_{\text{as}}\text{PC}_3$ ),  $657\text{ cm}^{-1}$  vs ( $\nu_{\text{s}}\text{PC}_3$ ).  $^1\text{H NMR}$  (500 MHz, THF- $d_8$ , 300 K, ppm):  $\delta = 1.05$  (s<sub>br</sub>, 27H,  $\text{PCH}_3$ ); 4.20 (s, 2H,  $\text{CH}_2$ ); 7.25–7.55 (m, 6H, Ar–H); 8.03 (m, 1H, Ar–H); 8.95 (m,

1H, Ar-H); 9.19 (m, 1H, Ar-H).  $^{13}\text{C}\{^1\text{H}\}$  NMR (125 MHz, THF- $d_8$ , 300 K, ppm):  $\delta$  = 20.9 (m, PCH<sub>3</sub>); 46.1 (s, CH<sub>2</sub>); 127.5 (s, CH); 129.4 (s, CH); 129.6 (d,  $^3J_{\text{P,C}}$  = 8.2 Hz, CH); 130.6 (s, CH); 133.8 (s, CH); 136.5 (s, CH); 138.2 (s, C); 151.2 (m, C); 158.4 (s, CH); 166.1 (s, Co-C=O); 183.7 (m, Co-C).  $^{31}\text{P}\{^1\text{H}\}$  NMR (202 MHz, THF- $d_8$ , 300 K, ppm):  $\delta$  = 1.5 (s<sub>br</sub>, 3P, PCH<sub>3</sub>). Anal. Calcd. for C<sub>23</sub>H<sub>38</sub>CoOP<sub>3</sub>: C 57.27; H 7.94; P 19.26. Found: C 56.49; H 7.39; P 19.53 %.

### Synthesis of [2-(3,4,5,6-Tetrafluoro-benzoyl- $\kappa\text{O}$ )phenyl- $\kappa\text{C}$ ]tris-(trimethylphosphine)cobalt(I) - (3)

1.20 g (3.17 mmol) of CoCH<sub>3</sub>(PMe<sub>3</sub>)<sub>4</sub> in THF were combined with 0.86 g (3.17 mmol) of 2,3,4,5,6-pentafluorobenzophenone at -70 °C. The mixture was warmed to 20 °C and kept stirring for 16 h. The volatiles were then removed in vacuo. The residue was extracted with pentane and combined solutions were cooled to afford brown crystals of **3** at -27 °C. Yield: 1.08 g (63 %); m. p. 152 -154 °C. IR (Nujol):  $\tilde{\nu}$  = 3077 cm<sup>-1</sup> vw (v H-C=C); 1617 cm<sup>-1</sup> m (v C=C); 1590 cm<sup>-1</sup> m (v C=C); 1490 cm<sup>-1</sup> m (v C=O), 1420 cm<sup>-1</sup> w ( $\delta_{\text{as}}$  PCH<sub>3</sub>); 1339 cm<sup>-1</sup> s (v F-C=C), 1277 cm<sup>-1</sup> s ( $\delta_{\text{s}}$  PCH<sub>3</sub>), 939 cm<sup>-1</sup> vs ( $\rho_1$  PCH<sub>3</sub>); 830 cm<sup>-1</sup> m ( $\rho_2$  PCH<sub>3</sub>), 760 m ( $\gamma$  C-H<sub>arom</sub>), 701 cm<sup>-1</sup> m ( $\nu_{\text{as}}$  PC<sub>3</sub>), 665 cm<sup>-1</sup> m ( $\nu_{\text{s}}$  PC<sub>3</sub>).  $^1\text{H}$  NMR (500 MHz, THF- $d_8$ , 300 K, ppm):  $\delta$  = 1.32 (d,  $^2J_{\text{P,H}}$  = 6.1 Hz, 27H, PCH<sub>3</sub>); 7.09 (t,  $^3J_{\text{H,H}}$  = 7.2 Hz, 2H, Ar-H); 7.48 (t,  $^3J_{\text{H,H}}$  = 7.0 Hz, 1H, Ar-H); 7.81 (t,  $^3J_{\text{H,H}}$  = 6.5 Hz, 2H, Ar-H).  $^{13}\text{C}\{^1\text{H}\}$  NMR (125 MHz, THF- $d_8$ , 300 K, ppm):  $\delta$  = 20.5 (d,  $^1J_{\text{P,C}}$  = 20.5 Hz, PCH<sub>3</sub>); 124.0 (s, CH); 124.3 (s, CH); 128.5 (m, CF); 128.8 (m, CF); 129.1 (s, CH); 129.4 (m, CF); 134.5 (m, CF); 141.5 (m, C); 147.4 (s, C); 167.9 (s, C=O); 168.7 (m, Co-C).  $^{31}\text{P}\{^1\text{H}\}$  NMR (202 MHz, THF- $d_8$ , 300 K, ppm):  $\delta$  = 3.6 (s<sub>br</sub>, PCH<sub>3</sub>). Anal. Calcd. for C<sub>22</sub>H<sub>32</sub>CoF<sub>4</sub>OP<sub>3</sub>: C 48.90; H 5.97; P 17.20. Found: C 48.58; H 5.70; P 16.88 %.

### Synthesis of (2-Fluoro-benzophenone- $\eta^2$ -C,O)tris(trimethylphosphine)cobalt(0) - (4)

1.05 g (2.79 mmol) of CoCH<sub>3</sub>(PMe<sub>3</sub>)<sub>4</sub> in THF were combined with 0.56 g (2.79 mmol) of 2-fluorobenzophenone at -70 °C. The mixture was warmed to 20 °C and kept stirring for 16 h. The

volatiles were then removed in vacuo. The residue was extracted with pentane and combined solutions were cooled to afford brown crystals of **4** at -27 °C. Yield: 1.05 g (77 %); m. p. 98 -102 °C. IR (Nujol):  $\tilde{\nu}$  = 3000  $\text{cm}^{-1}$  vw ( $\nu$  H-C=C); 1878  $\text{cm}^{-1}$  s ( $\nu$  C=O); 1604  $\text{cm}^{-1}$  m ( $\nu$  C=C); 1587  $\text{cm}^{-1}$  m ( $\nu$  C=C), 1423  $\text{cm}^{-1}$  w ( $\delta_{\text{as}}$  PCH<sub>3</sub>), 1274  $\text{cm}^{-1}$  s ( $\delta_{\text{s}}$  PCH<sub>3</sub>), 933  $\text{cm}^{-1}$  vs ( $\rho_1$  PCH<sub>3</sub>), 841  $\text{cm}^{-1}$  m ( $\rho_2$  PCH<sub>3</sub>), 765 m ( $\gamma$  C-H<sub>arom</sub>), 695  $\text{cm}^{-1}$  m ( $\nu_{\text{as}}$  PC<sub>3</sub>), 656  $\text{cm}^{-1}$  m ( $\nu_{\text{s}}$  PC<sub>3</sub>). Anal. Calcd. for C<sub>22</sub>H<sub>36</sub>CoFOP<sub>3</sub>: C 54.22; H 7.45; P 19.07. Found: C 54.19; H 7.43; P 18.55 %.

### References:

- (1) Schulze, M. *Angew. Chem.* **1958**, *70*, 697.
- (2) Strohmeier, W. *Chem. Ber.* **1955**, *88*, 1218.
- (3) Klein, H.-F.; Karsch, H. H. *Chem. Ber.* **1975**, *108*, 944.
- (4) Wolfsberger, W.; Schmidbaur, H. *Syn. React. Inorg. Metal-Org. Chem.* **1974**, *4*, 149.
- (5) Sheldrick, G. M.; Krüger, C.; Goddard, R. *SHELXS-97* and *SHELXL-97*, Universität Göttingen, **1997**.

### Crystallographic Data

**Table 1.** Crystal data and structure refinement for **1**

|                     |                 |
|---------------------|-----------------|
| Identification code | k1096           |
| Empirical formula   | C22 H36 Co O P3 |

|                                   |                                             |                       |
|-----------------------------------|---------------------------------------------|-----------------------|
| Formula weight                    | 468.35                                      |                       |
| Temperature                       | 298(2) K                                    |                       |
| Wavelength                        | 0.71073 Å                                   |                       |
| Crystal system                    | Orthorhombic                                |                       |
| Space group                       | Pna2(1)                                     |                       |
| Unit cell dimensions              | a = 16.4913(9) Å                            | $\alpha = 90^\circ$ . |
|                                   | b = 9.5041(5) Å                             | $\beta = 90^\circ$ .  |
|                                   | c = 15.8471(9) Å                            | $\gamma = 90^\circ$ . |
| Volume                            | 2483.8(2) Å <sup>3</sup>                    |                       |
| Z                                 | 4                                           |                       |
| Density (calculated)              | 1.252 Mg/m <sup>3</sup>                     |                       |
| Absorption coefficient            | 0.893 mm <sup>-1</sup>                      |                       |
| F(000)                            | 992                                         |                       |
| Crystal size                      | 0.50 x 0.45 x 0.40 mm <sup>3</sup>          |                       |
| Theta range for data collection   | 2.47 to 28.30°.                             |                       |
| Index ranges                      | -21 ≤ h ≤ 21, -12 ≤ k ≤ 12, -19 ≤ l ≤ 21    |                       |
| Reflections collected             | 23133                                       |                       |
| Independent reflections           | 5960 [R(int) = 0.0234]                      |                       |
| Completeness to theta = 28.30°    | 99.8 %                                      |                       |
| Absorption correction             | Semi-empirical from equivalents             |                       |
| Max. and min. transmission        | 0.983 and 0.699                             |                       |
| Refinement method                 | Full-matrix least-squares on F <sup>2</sup> |                       |
| Data / restraints / parameters    | 5960 / 1 / 254                              |                       |
| Goodness-of-fit on F <sup>2</sup> | 1.051                                       |                       |
| Final R indices [I > 2σ(I)]       | R1 = 0.0295, wR2 = 0.0705                   |                       |
| R indices (all data)              | R1 = 0.0339, wR2 = 0.0727                   |                       |
| Absolute structure parameter      | 0.005(9)                                    |                       |
| Extinction coefficient            | 0.0011(3)                                   |                       |
| Largest diff. peak and hole       | 0.256 and -0.266 e.Å <sup>-3</sup>          |                       |

**Table 2.** Atomic coordinates ( $\times 10^4$ ) and equivalent isotropic displacement parameters ( $\text{\AA}^2 \times 10^3$ ) for **1**.  $U(\text{eq})$  is defined as one third of the trace of the orthogonalized  $U^{ij}$  tensor.

|       | x       | y        | z       | U(eq) |
|-------|---------|----------|---------|-------|
| Co(1) | 2849(1) | 2035(1)  | 2493(1) | 35(1) |
| P(1)  | 1810(1) | 1023(1)  | 3086(1) | 49(1) |
| P(2)  | 2264(1) | 4111(1)  | 2216(1) | 44(1) |
| P(3)  | 3010(1) | 1283(1)  | 1201(1) | 46(1) |
| O(1)  | 3423(1) | 3165(1)  | 3287(1) | 39(1) |
| C(1)  | 3556(1) | 581(2)   | 2927(1) | 44(1) |
| C(2)  | 3662(2) | -840(2)  | 2708(2) | 59(1) |
| C(3)  | 4258(2) | -1679(2) | 3066(2) | 68(1) |
| C(4)  | 4777(2) | -1125(2) | 3667(2) | 65(1) |
| C(5)  | 4681(1) | 222(2)   | 3927(2) | 56(1) |
| C(6)  | 4065(1) | 1088(2)  | 3591(1) | 43(1) |
| C(7)  | 3921(1) | 2532(2)  | 3795(1) | 39(1) |
| C(8)  | 4264(1) | 3355(2)  | 4485(1) | 43(1) |
| C(9)  | 4551(2) | 2751(3)  | 5239(2) | 58(1) |
| C(10) | 4896(2) | 3586(3)  | 5861(2) | 74(1) |
| C(11) | 4964(2) | 5003(3)  | 5761(2) | 76(1) |
| C(12) | 4658(2) | 5626(3)  | 5048(2) | 66(1) |
| C(13) | 4310(1) | 4814(2)  | 4420(1) | 49(1) |
| C(14) | 1818(2) | 1313(4)  | 4227(2) | 89(1) |
| C(15) | 1673(2) | -880(3)  | 3052(2) | 84(1) |
| C(16) | 773(2)  | 1559(3)  | 2814(2) | 75(1) |
| C(17) | 1382(2) | 4418(4)  | 1535(2) | 90(1) |
| C(18) | 2983(2) | 5412(3)  | 1813(2) | 73(1) |
| C(19) | 1939(2) | 5006(3)  | 3178(2) | 69(1) |
| C(20) | 4060(2) | 882(4)   | 903(2)  | 92(1) |
| C(21) | 2493(2) | -319(3)  | 843(2)  | 72(1) |
| C(22) | 2740(3) | 2414(4)  | 307(2)  | 97(1) |

**Table 3.** Bond lengths [Å] and angles [°] for **1**.

---

|                 |            |
|-----------------|------------|
| Co(1)-O(1)      | 1.9051(12) |
| Co(1)-C(1)      | 1.9339(18) |
| Co(1)-P(1)      | 2.1786(6)  |
| Co(1)-P(3)      | 2.1852(6)  |
| Co(1)-P(2)      | 2.2401(5)  |
| P(1)-C(15)      | 1.823(2)   |
| P(1)-C(14)      | 1.830(3)   |
| P(1)-C(16)      | 1.835(3)   |
| P(2)-C(19)      | 1.826(3)   |
| P(2)-C(18)      | 1.828(3)   |
| P(2)-C(17)      | 1.834(3)   |
| P(3)-C(22)      | 1.834(3)   |
| P(3)-C(20)      | 1.835(3)   |
| P(3)-C(21)      | 1.835(2)   |
| O(1)-C(7)       | 1.297(2)   |
| C(1)-C(2)       | 1.405(3)   |
| C(1)-C(6)       | 1.430(3)   |
| C(2)-C(3)       | 1.386(3)   |
| C(3)-C(4)       | 1.385(4)   |
| C(4)-C(5)       | 1.355(3)   |
| C(5)-C(6)       | 1.411(3)   |
| C(6)-C(7)       | 1.430(3)   |
| C(7)-C(8)       | 1.460(3)   |
| C(8)-C(13)      | 1.393(3)   |
| C(8)-C(9)       | 1.407(3)   |
| C(9)-C(10)      | 1.387(4)   |
| C(10)-C(11)     | 1.360(4)   |
| C(11)-C(12)     | 1.372(4)   |
| C(12)-C(13)     | 1.384(3)   |
| O(1)-Co(1)-C(1) | 82.49(7)   |
| O(1)-Co(1)-P(1) | 110.84(5)  |
| C(1)-Co(1)-P(1) | 90.33(6)   |
| O(1)-Co(1)-P(3) | 137.94(5)  |



|                  |            |
|------------------|------------|
| C(1)-Co(1)-P(3)  | 91.46(6)   |
| P(1)-Co(1)-P(3)  | 110.77(2)  |
| O(1)-Co(1)-P(2)  | 81.21(4)   |
| C(1)-Co(1)-P(2)  | 163.52(6)  |
| P(1)-Co(1)-P(2)  | 97.73(2)   |
| P(3)-Co(1)-P(2)  | 99.01(2)   |
| C(15)-P(1)-C(14) | 100.32(16) |
| C(15)-P(1)-C(16) | 98.84(15)  |
| C(14)-P(1)-C(16) | 101.36(17) |
| C(15)-P(1)-Co(1) | 121.54(10) |
| C(14)-P(1)-Co(1) | 110.66(11) |
| C(16)-P(1)-Co(1) | 120.63(10) |
| C(19)-P(2)-C(18) | 99.62(14)  |
| C(19)-P(2)-C(17) | 100.60(15) |
| C(18)-P(2)-C(17) | 101.62(17) |
| C(19)-P(2)-Co(1) | 111.90(9)  |
| C(18)-P(2)-Co(1) | 112.62(10) |
| C(17)-P(2)-Co(1) | 126.68(11) |
| C(22)-P(3)-C(20) | 98.76(19)  |
| C(22)-P(3)-C(21) | 97.70(16)  |
| C(20)-P(3)-C(21) | 100.74(16) |
| C(22)-P(3)-Co(1) | 120.21(11) |
| C(20)-P(3)-Co(1) | 115.09(13) |
| C(21)-P(3)-Co(1) | 120.32(10) |
| C(7)-O(1)-Co(1)  | 117.51(11) |
| C(2)-C(1)-C(6)   | 115.63(18) |
| C(2)-C(1)-Co(1)  | 132.40(16) |
| C(6)-C(1)-Co(1)  | 111.97(13) |
| C(3)-C(2)-C(1)   | 122.7(2)   |
| C(4)-C(3)-C(2)   | 120.1(2)   |
| C(5)-C(4)-C(3)   | 119.7(2)   |
| C(4)-C(5)-C(6)   | 121.4(2)   |
| C(5)-C(6)-C(7)   | 126.45(18) |
| C(5)-C(6)-C(1)   | 120.25(18) |
| C(7)-C(6)-C(1)   | 113.08(16) |
| O(1)-C(7)-C(6)   | 114.23(16) |

Supplementary Material (ESI) for Dalton Transactions  
This journal is (c) The Royal Society of Chemistry 2008

|                   |            |
|-------------------|------------|
| O(1)-C(7)-C(8)    | 117.51(17) |
| C(6)-C(7)-C(8)    | 128.25(17) |
| C(13)-C(8)-C(9)   | 116.84(18) |
| C(13)-C(8)-C(7)   | 119.94(18) |
| C(9)-C(8)-C(7)    | 123.22(19) |
| C(10)-C(9)-C(8)   | 120.5(2)   |
| C(11)-C(10)-C(9)  | 121.2(2)   |
| C(10)-C(11)-C(12) | 119.5(2)   |
| C(11)-C(12)-C(13) | 120.3(2)   |
| C(12)-C(13)-C(8)  | 121.6(2)   |

---

**Table 4.** Anisotropic displacement parameters ( $\text{\AA}^2 \times 10^3$ ) for **1**. The anisotropic displacement factor exponent takes the form:  $-2\pi^2 [h^2 a^{*2}U^{11} + \dots + 2 h k a^* b^* U^{12}]$

|       | U <sup>11</sup> | U <sup>22</sup> | U <sup>33</sup> | U <sup>23</sup> | U <sup>13</sup> | U <sup>12</sup> |
|-------|-----------------|-----------------|-----------------|-----------------|-----------------|-----------------|
| Co(1) | 40(1)           | 29(1)           | 34(1)           | 0(1)            | -3(1)           | 0(1)            |
| P(1)  | 58(1)           | 45(1)           | 43(1)           | 0(1)            | 9(1)            | -11(1)          |
| P(2)  | 48(1)           | 36(1)           | 49(1)           | 2(1)            | -5(1)           | 5(1)            |
| P(3)  | 59(1)           | 42(1)           | 38(1)           | -3(1)           | 6(1)            | 0(1)            |
| O(1)  | 44(1)           | 34(1)           | 40(1)           | -1(1)           | -6(1)           | -1(1)           |
| C(1)  | 50(1)           | 34(1)           | 48(1)           | 2(1)            | -6(1)           | 4(1)            |
| C(2)  | 76(2)           | 39(1)           | 64(2)           | -3(1)           | -19(1)          | 5(1)            |
| C(3)  | 88(2)           | 39(1)           | 76(2)           | -1(1)           | -8(1)           | 14(1)           |
| C(4)  | 69(1)           | 53(1)           | 74(2)           | 10(1)           | -16(1)          | 17(1)           |
| C(5)  | 54(1)           | 51(1)           | 62(1)           | 7(1)            | -12(1)          | 6(1)            |
| C(6)  | 43(1)           | 41(1)           | 44(1)           | 5(1)            | -4(1)           | -1(1)           |
| C(7)  | 38(1)           | 40(1)           | 38(1)           | 3(1)            | -1(1)           | -1(1)           |
| C(8)  | 37(1)           | 53(1)           | 37(1)           | -4(1)           | 1(1)            | -4(1)           |
| C(9)  | 61(1)           | 70(1)           | 44(1)           | 5(1)            | -6(1)           | -1(1)           |
| C(10) | 71(2)           | 106(2)          | 46(1)           | -6(1)           | -12(1)          | 2(2)            |
| C(11) | 65(2)           | 100(2)          | 63(2)           | -37(1)          | -9(1)           | -10(1)          |
| C(12) | 66(2)           | 66(1)           | 66(2)           | -24(1)          | 4(1)            | -11(1)          |
| C(13) | 52(1)           | 52(1)           | 43(1)           | -9(1)           | 2(1)            | -6(1)           |
| C(14) | 117(3)          | 106(2)          | 43(1)           | 3(1)            | 18(2)           | -28(2)          |
| C(15) | 102(2)          | 54(1)           | 95(2)           | 3(1)            | 24(2)           | -30(1)          |
| C(16) | 45(1)           | 94(2)           | 84(2)           | -5(2)           | 11(1)           | -10(1)          |
| C(17) | 79(2)           | 89(2)           | 101(2)          | 4(2)            | -40(2)          | 26(2)           |
| C(18) | 93(2)           | 46(1)           | 80(2)           | 9(1)            | 6(2)            | -11(1)          |
| C(19) | 83(2)           | 52(1)           | 72(2)           | -13(1)          | 7(1)            | 21(1)           |
| C(20) | 73(2)           | 107(2)          | 96(2)           | -4(2)           | 42(2)           | 3(2)            |
| C(21) | 99(2)           | 60(1)           | 55(2)           | -12(1)          | -14(1)          | -12(2)          |
| C(22) | 176(4)          | 78(2)           | 38(1)           | 7(1)            | -4(2)           | 22(2)           |

**Table 5.** Hydrogen coordinates ( $\times 10^4$ ) and isotropic displacement parameters ( $\text{\AA}^2 \times 10^{-3}$ ) for **1**.

|        | x    | y     | z    | U(eq) |
|--------|------|-------|------|-------|
| H(2A)  | 3319 | -1234 | 2307 | 71    |
| H(3A)  | 4308 | -2614 | 2902 | 81    |
| H(4A)  | 5191 | -1676 | 3891 | 78    |
| H(5A)  | 5028 | 585   | 4336 | 67    |
| H(9A)  | 4509 | 1785  | 5320 | 70    |
| H(10A) | 5084 | 3170  | 6354 | 89    |
| H(11A) | 5215 | 5545  | 6174 | 91    |
| H(12A) | 4685 | 6598  | 4986 | 79    |
| H(13A) | 4101 | 5254  | 3943 | 59    |
| H(14A) | 1378 | 808   | 4481 | 133   |
| H(14B) | 1760 | 2300  | 4342 | 133   |
| H(14C) | 2323 | 985   | 4457 | 133   |
| H(15A) | 2159 | -1334 | 3243 | 125   |
| H(15B) | 1558 | -1167 | 2484 | 125   |
| H(15C) | 1229 | -1141 | 3412 | 125   |
| H(16A) | 395  | 899   | 3049 | 112   |
| H(16B) | 714  | 1581  | 2212 | 112   |
| H(16C) | 668  | 2479  | 3040 | 112   |
| H(17A) | 964  | 3752  | 1670 | 135   |
| H(17B) | 1538 | 4308  | 955  | 135   |
| H(17C) | 1182 | 5356  | 1624 | 135   |
| H(18A) | 2712 | 6298  | 1739 | 109   |
| H(18B) | 3195 | 5100  | 1281 | 109   |
| H(18C) | 3420 | 5523  | 2208 | 109   |
| H(19A) | 1790 | 5958  | 3047 | 104   |
| H(19B) | 2375 | 5007  | 3579 | 104   |
| H(19C) | 1480 | 4524  | 3413 | 104   |
| H(20A) | 4080 | 633   | 316  | 138   |
| H(20B) | 4255 | 109   | 1236 | 138   |

Supplementary Material (ESI) for Dalton Transactions  
This journal is (c) The Royal Society of Chemistry 2008

|        |      |       |      |     |
|--------|------|-------|------|-----|
| H(20C) | 4394 | 1693  | 1000 | 138 |
| H(21A) | 1918 | -202  | 902  | 107 |
| H(21B) | 2668 | -1103 | 1178 | 107 |
| H(21C) | 2623 | -489  | 262  | 107 |
| H(22A) | 2917 | 1982  | -209 | 146 |
| H(22B) | 2998 | 3313  | 369  | 146 |
| H(22C) | 2162 | 2538  | 291  | 146 |

---

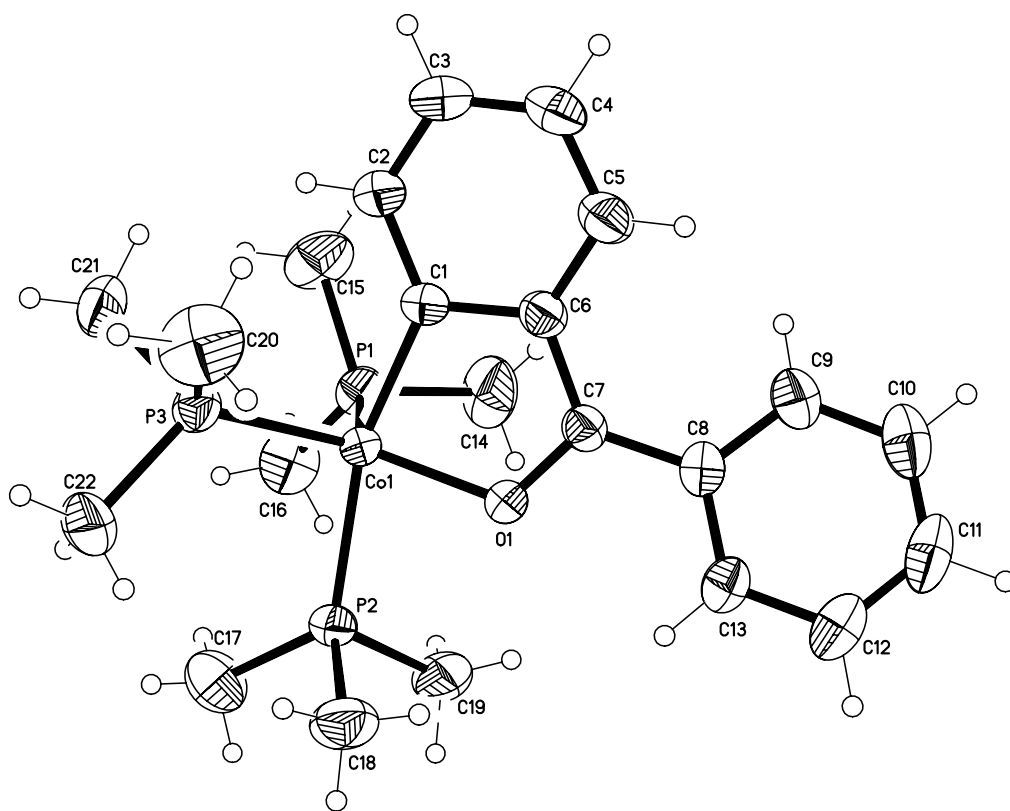

Molecular structure of **1**

**Table 1.** Crystal data and structure refinement for **3**.

|                                   |                                                                    |                              |
|-----------------------------------|--------------------------------------------------------------------|------------------------------|
| Empirical formula                 | C <sub>22</sub> H <sub>32</sub> Co F <sub>4</sub> O P <sub>3</sub> |                              |
| Formula weight                    | 540.32                                                             |                              |
| Temperature                       | 150(2) K                                                           |                              |
| Wavelength                        | 0.71073 Å                                                          |                              |
| Crystal system                    | Monoclinic                                                         |                              |
| Space group                       | P21/c                                                              |                              |
| Unit cell dimensions              | a = 12.7954(16) Å                                                  | $\alpha = 90^\circ$ .        |
|                                   | b = 14.830(2) Å                                                    | $\beta = 130.890(8)^\circ$ . |
|                                   | c = 17.434(2) Å                                                    | $\gamma = 90^\circ$ .        |
| Volume                            | 2500.9(5) Å <sup>3</sup>                                           |                              |
| Z                                 | 4                                                                  |                              |
| Density (calculated)              | 1.435 Mg/m <sup>3</sup>                                            |                              |
| Absorption coefficient            | 0.920 mm <sup>-1</sup>                                             |                              |
| F(000)                            | 1120                                                               |                              |
| Crystal size                      | 0.12 x 0.10 x 0.09 mm <sup>3</sup>                                 |                              |
| Theta range for data collection   | 2.07 to 26.88°.                                                    |                              |
| Index ranges                      | -16 ≤ h ≤ 16, -18 ≤ k ≤ 18, -22 ≤ l ≤ 21                           |                              |
| Reflections collected             | 34404                                                              |                              |
| Independent reflections           | 5329 [R(int) = 0.1791]                                             |                              |
| Completeness to theta = 26.88°    | 98.7 %                                                             |                              |
| Absorption correction             | None                                                               |                              |
| Refinement method                 | Full-matrix least-squares on F <sup>2</sup>                        |                              |
| Data / restraints / parameters    | 5329 / 0 / 289                                                     |                              |
| Goodness-of-fit on F <sup>2</sup> | 1.049                                                              |                              |
| Final R indices [I > 2σ(I)]       | R1 = 0.0564, wR2 = 0.1067                                          |                              |
| R indices (all data)              | R1 = 0.0916, wR2 = 0.1162                                          |                              |
| Largest diff. peak and hole       | 0.525 and -0.623 e.Å <sup>-3</sup>                                 |                              |

**Table 2.** Atomic coordinates ( $\times 10^4$ ) and equivalent isotropic displacement parameters ( $\text{\AA}^2 \times 10^3$ ) for **3**.  $U(\text{eq})$  is defined as one third of the trace of the orthogonalized  $U^{ij}$  tensor.

|       | x       | y        | z        | U(eq) |
|-------|---------|----------|----------|-------|
| C(1)  | 4033(4) | 681(2)   | -2807(3) | 23(1) |
| C(2)  | 3606(4) | 193(2)   | -2372(3) | 24(1) |
| C(3)  | 2259(4) | 142(2)   | -2768(3) | 26(1) |
| C(4)  | 1229(4) | 580(3)   | -3672(3) | 27(1) |
| C(5)  | 1559(4) | 1048(3)  | -4153(3) | 26(1) |
| C(6)  | 2929(4) | 1090(2)  | -3774(3) | 22(1) |
| C(7)  | 3413(4) | 1545(2)  | -4211(3) | 20(1) |
| C(8)  | 2596(3) | 1919(2)  | -5239(3) | 20(1) |
| C(9)  | 1417(4) | 1486(3)  | -6093(3) | 26(1) |
| C(10) | 700(4)  | 1853(3)  | -7051(3) | 31(1) |
| C(11) | 1126(4) | 2650(3)  | -7181(3) | 32(1) |
| C(12) | 2294(4) | 3078(3)  | -6350(3) | 30(1) |
| C(13) | 3034(4) | 2713(3)  | -5391(3) | 25(1) |
| C(14) | 5697(5) | 1552(3)  | -478(4)  | 37(1) |
| C(15) | 7879(5) | 405(3)   | 146(3)   | 40(1) |
| C(16) | 7919(5) | 2254(3)  | -162(3)  | 41(1) |
| C(17) | 5551(6) | -1388(3) | -2250(4) | 41(1) |
| C(18) | 7890(5) | -880(3)  | -1907(4) | 47(1) |
| C(19) | 5264(6) | -695(3)  | -3864(4) | 49(1) |
| C(20) | 9373(4) | 1311(3)  | -1192(3) | 34(1) |
| C(21) | 7413(5) | 1229(3)  | -3332(3) | 37(1) |
| C(22) | 7503(4) | 2738(3)  | -2354(3) | 31(1) |
| Co(1) | 5829(1) | 964(1)   | -2366(1) | 18(1) |
| F(1)  | 4556(3) | -252(2)  | -1467(2) | 32(1) |
| F(2)  | 1928(3) | -312(2)  | -2274(2) | 38(1) |
| F(3)  | -87(2)  | 563(2)   | -4025(2) | 40(1) |
| F(4)  | 514(2)  | 1508(2)  | -5006(2) | 38(1) |
| O(1)  | 4744(2) | 1617(2)  | -3612(2) | 19(1) |
| P(1)  | 6772(1) | 1277(1)  | -794(1)  | 23(1) |
| P(2)  | 7543(1) | 1516(1)  | -2255(1) | 22(1) |



|      |         |         |          |       |
|------|---------|---------|----------|-------|
| P(3) | 6163(1) | -449(1) | -2536(1) | 24(1) |
|------|---------|---------|----------|-------|

---

**Table 3.** Bond lengths [Å] and angles [°] for **3**.

---

|             |            |
|-------------|------------|
| C(1)-C(2)   | 1.393(5)   |
| C(1)-C(6)   | 1.444(5)   |
| C(1)-Co(1)  | 1.932(4)   |
| C(2)-F(1)   | 1.376(4)   |
| C(2)-C(3)   | 1.378(6)   |
| C(3)-F(2)   | 1.361(4)   |
| C(3)-C(4)   | 1.387(6)   |
| C(4)-C(5)   | 1.352(5)   |
| C(4)-F(3)   | 1.363(4)   |
| C(5)-F(4)   | 1.364(4)   |
| C(5)-C(6)   | 1.413(5)   |
| C(6)-C(7)   | 1.428(5)   |
| C(7)-O(1)   | 1.293(4)   |
| C(7)-C(8)   | 1.470(5)   |
| C(8)-C(9)   | 1.401(5)   |
| C(8)-C(13)  | 1.402(5)   |
| C(9)-C(10)  | 1.386(6)   |
| C(10)-C(11) | 1.381(6)   |
| C(11)-C(12) | 1.378(6)   |
| C(12)-C(13) | 1.383(5)   |
| C(14)-P(1)  | 1.832(4)   |
| C(15)-P(1)  | 1.824(4)   |
| C(16)-P(1)  | 1.830(4)   |
| C(17)-P(3)  | 1.820(4)   |
| C(18)-P(3)  | 1.823(5)   |
| C(19)-P(3)  | 1.825(5)   |
| C(20)-P(2)  | 1.824(4)   |
| C(21)-P(2)  | 1.825(4)   |
| C(22)-P(2)  | 1.817(4)   |
| Co(1)-O(1)  | 1.907(2)   |
| Co(1)-P(3)  | 2.1962(11) |
| Co(1)-P(1)  | 2.2026(11) |
| Co(1)-P(2)  | 2.2273(11) |

|                   |           |
|-------------------|-----------|
| C(2)-C(1)-C(6)    | 114.9(3)  |
| C(2)-C(1)-Co(1)   | 133.1(3)  |
| C(6)-C(1)-Co(1)   | 112.0(2)  |
| F(1)-C(2)-C(3)    | 115.0(3)  |
| F(1)-C(2)-C(1)    | 120.5(3)  |
| C(3)-C(2)-C(1)    | 124.4(4)  |
| F(2)-C(3)-C(2)    | 121.1(4)  |
| F(2)-C(3)-C(4)    | 119.6(3)  |
| C(2)-C(3)-C(4)    | 119.3(3)  |
| C(5)-C(4)-F(3)    | 121.6(4)  |
| C(5)-C(4)-C(3)    | 119.7(3)  |
| F(3)-C(4)-C(3)    | 118.6(3)  |
| C(4)-C(5)-F(4)    | 116.8(3)  |
| C(4)-C(5)-C(6)    | 121.9(4)  |
| F(4)-C(5)-C(6)    | 121.2(3)  |
| C(5)-C(6)-C(7)    | 127.6(3)  |
| C(5)-C(6)-C(1)    | 119.6(3)  |
| C(7)-C(6)-C(1)    | 112.7(3)  |
| O(1)-C(7)-C(6)    | 114.2(3)  |
| O(1)-C(7)-C(8)    | 117.6(3)  |
| C(6)-C(7)-C(8)    | 128.2(3)  |
| C(9)-C(8)-C(13)   | 118.0(3)  |
| C(9)-C(8)-C(7)    | 122.3(3)  |
| C(13)-C(8)-C(7)   | 119.6(3)  |
| C(10)-C(9)-C(8)   | 120.2(4)  |
| C(11)-C(10)-C(9)  | 120.8(4)  |
| C(12)-C(11)-C(10) | 119.7(4)  |
| C(11)-C(12)-C(13) | 120.2(4)  |
| C(12)-C(13)-C(8)  | 121.0(4)  |
| O(1)-Co(1)-C(1)   | 82.35(13) |
| O(1)-Co(1)-P(3)   | 113.06(8) |
| C(1)-Co(1)-P(3)   | 91.45(11) |
| O(1)-Co(1)-P(1)   | 135.02(8) |
| C(1)-Co(1)-P(1)   | 94.65(11) |
| P(3)-Co(1)-P(1)   | 111.87(4) |
| O(1)-Co(1)-P(2)   | 81.58(8)  |

|                  |            |
|------------------|------------|
| C(1)-Co(1)-P(2)  | 163.92(12) |
| P(3)-Co(1)-P(2)  | 95.47(4)   |
| P(1)-Co(1)-P(2)  | 96.20(4)   |
| C(7)-O(1)-Co(1)  | 118.1(2)   |
| C(15)-P(1)-C(16) | 100.1(2)   |
| C(15)-P(1)-C(14) | 100.5(2)   |
| C(16)-P(1)-C(14) | 96.1(2)    |
| C(15)-P(1)-Co(1) | 116.04(15) |
| C(16)-P(1)-Co(1) | 119.09(15) |
| C(14)-P(1)-Co(1) | 120.93(15) |
| C(22)-P(2)-C(20) | 101.6(2)   |
| C(22)-P(2)-C(21) | 99.0(2)    |
| C(20)-P(2)-C(21) | 101.4(2)   |
| C(22)-P(2)-Co(1) | 113.18(13) |
| C(20)-P(2)-Co(1) | 124.30(15) |
| C(21)-P(2)-Co(1) | 113.79(15) |
| C(17)-P(3)-C(18) | 97.8(2)    |
| C(17)-P(3)-C(19) | 99.6(2)    |
| C(18)-P(3)-C(19) | 101.7(2)   |
| C(17)-P(3)-Co(1) | 122.43(15) |
| C(18)-P(3)-Co(1) | 121.33(16) |
| C(19)-P(3)-Co(1) | 110.22(17) |

---

Symmetry transformations used to generate equivalent atoms:

**Table 4.** Anisotropic displacement parameters ( $\text{\AA}^2 \times 10^3$ ) for **3**. The anisotropic displacement factor exponent takes the form:  $-2\pi^2 [ h^2 a^{*2} U^{11} + \dots + 2 h k a^* b^* U^{12} ]$

|       | $U^{11}$ | $U^{22}$ | $U^{33}$ | $U^{23}$ | $U^{13}$ | $U^{12}$ |
|-------|----------|----------|----------|----------|----------|----------|
| C(1)  | 28(2)    | 19(2)    | 25(2)    | -3(1)    | 18(2)    | -6(2)    |
| C(2)  | 34(2)    | 17(2)    | 26(2)    | -1(2)    | 21(2)    | -3(2)    |
| C(3)  | 42(2)    | 18(2)    | 39(2)    | -7(2)    | 36(2)    | -10(2)   |
| C(4)  | 24(2)    | 24(2)    | 36(2)    | -8(2)    | 22(2)    | -7(2)    |
| C(5)  | 22(2)    | 28(2)    | 27(2)    | -2(2)    | 16(2)    | -3(2)    |
| C(6)  | 22(2)    | 18(2)    | 25(2)    | -3(2)    | 15(2)    | -2(1)    |
| C(7)  | 19(2)    | 17(2)    | 21(2)    | -2(1)    | 12(2)    | 0(1)     |
| C(8)  | 15(2)    | 20(2)    | 23(2)    | 2(1)     | 12(2)    | 3(1)     |
| C(9)  | 24(2)    | 28(2)    | 23(2)    | -2(2)    | 14(2)    | -1(2)    |
| C(10) | 22(2)    | 43(2)    | 22(2)    | -4(2)    | 13(2)    | -2(2)    |
| C(11) | 24(2)    | 47(3)    | 22(2)    | 10(2)    | 14(2)    | 10(2)    |
| C(12) | 31(2)    | 30(2)    | 31(2)    | 8(2)     | 21(2)    | 2(2)     |
| C(13) | 23(2)    | 27(2)    | 25(2)    | 3(2)     | 15(2)    | 0(2)     |
| C(14) | 38(2)    | 39(2)    | 42(3)    | -13(2)   | 30(2)    | -4(2)    |
| C(15) | 44(3)    | 41(3)    | 25(2)    | 5(2)     | 19(2)    | 12(2)    |
| C(16) | 37(2)    | 50(3)    | 30(2)    | -14(2)   | 20(2)    | -14(2)   |
| C(17) | 66(3)    | 23(2)    | 53(3)    | -1(2)    | 48(3)    | -3(2)    |
| C(18) | 58(3)    | 27(2)    | 69(4)    | 4(2)     | 47(3)    | 13(2)    |
| C(19) | 78(4)    | 34(2)    | 38(3)    | -11(2)   | 40(3)    | -15(2)   |
| C(20) | 27(2)    | 32(2)    | 39(3)    | 6(2)     | 20(2)    | 6(2)     |
| C(21) | 45(3)    | 43(3)    | 33(2)    | 3(2)     | 29(2)    | -3(2)    |
| C(22) | 25(2)    | 26(2)    | 38(2)    | 5(2)     | 19(2)    | 1(2)     |
| Co(1) | 18(1)    | 16(1)    | 18(1)    | 2(1)     | 11(1)    | 1(1)     |
| F(1)  | 45(1)    | 27(1)    | 30(1)    | 7(1)     | 27(1)    | 0(1)     |
| F(2)  | 60(2)    | 29(1)    | 55(2)    | -4(1)    | 51(2)    | -11(1)   |
| F(3)  | 32(1)    | 44(1)    | 60(2)    | -10(1)   | 37(1)    | -11(1)   |
| F(4)  | 22(1)    | 46(2)    | 38(2)    | 11(1)    | 17(1)    | 6(1)     |
| O(1)  | 17(1)    | 19(1)    | 19(1)    | 3(1)     | 10(1)    | 1(1)     |
| P(1)  | 24(1)    | 23(1)    | 21(1)    | -1(1)    | 14(1)    | 3(1)     |
| P(2)  | 18(1)    | 21(1)    | 24(1)    | 4(1)     | 13(1)    | 2(1)     |
| P(3)  | 36(1)    | 18(1)    | 25(1)    | 0(1)     | 22(1)    | 0(1)     |



**Table 5.** Hydrogen coordinates ( $\times 10^4$ ) and isotropic displacement parameters ( $\text{\AA}^2 \times 10^3$ ) for **3**.

|        | x    | y     | z     | U(eq) |
|--------|------|-------|-------|-------|
| H(9A)  | 1115 | 950   | -6016 | 31    |
| H(10A) | -78  | 1558  | -7614 | 37    |
| H(11A) | 627  | 2897  | -7825 | 38    |
| H(12A) | 2585 | 3614  | -6434 | 36    |
| H(13A) | 3836 | 2998  | -4839 | 30    |
| H(14A) | 6276 | 1747  | 216   | 55    |
| H(14B) | 5186 | 1028  | -569  | 55    |
| H(14C) | 5065 | 2026  | -914  | 55    |
| H(15A) | 7362 | -144  | -48   | 60    |
| H(15B) | 8206 | 596   | 797   | 60    |
| H(15C) | 8654 | 303   | 185   | 60    |
| H(16A) | 8256 | 2299  | 516   | 61    |
| H(16B) | 7417 | 2792  | -532  | 61    |
| H(16C) | 8684 | 2184  | -140  | 61    |
| H(17A) | 6052 | -1404 | -1534 | 61    |
| H(17B) | 5694 | -1942 | -2454 | 61    |
| H(17C) | 4583 | -1313 | -2612 | 61    |
| H(18A) | 7828 | -1499 | -2094 | 71    |
| H(18B) | 8447 | -838  | -1185 | 71    |
| H(18C) | 8305 | -531  | -2110 | 71    |
| H(19A) | 4298 | -563  | -4271 | 73    |
| H(19B) | 5379 | -1321 | -3934 | 73    |
| H(19C) | 5643 | -331  | -4086 | 73    |
| H(20A) | 9918 | 1618  | -1310 | 51    |
| H(20B) | 9555 | 676   | -1130 | 51    |
| H(20C) | 9610 | 1533  | -578  | 51    |
| H(21A) | 7589 | 597   | -3315 | 56    |
| H(21B) | 8081 | 1571  | -3297 | 56    |
| H(21C) | 6501 | 1369  | -3952 | 56    |

Supplementary Material (ESI) for Dalton Transactions  
This journal is (c) The Royal Society of Chemistry 2008

|        |      |      |       |    |
|--------|------|------|-------|----|
| H(22A) | 7687 | 3001 | -1773 | 47 |
| H(22B) | 6607 | 2926 | -2959 | 47 |
| H(22C) | 8193 | 2931 | -2382 | 47 |

---



**Table 6.** Torsion angles [°] for **3**.

---

|                       |           |
|-----------------------|-----------|
| C(6)-C(1)-C(2)-F(1)   | 177.9(3)  |
| Co(1)-C(1)-C(2)-F(1)  | -4.2(6)   |
| C(6)-C(1)-C(2)-C(3)   | -4.7(5)   |
| Co(1)-C(1)-C(2)-C(3)  | 173.1(3)  |
| F(1)-C(2)-C(3)-F(2)   | 0.8(5)    |
| C(1)-C(2)-C(3)-F(2)   | -176.7(3) |
| F(1)-C(2)-C(3)-C(4)   | 179.2(3)  |
| C(1)-C(2)-C(3)-C(4)   | 1.7(6)    |
| F(2)-C(3)-C(4)-C(5)   | 178.5(3)  |
| C(2)-C(3)-C(4)-C(5)   | 0.1(6)    |
| F(2)-C(3)-C(4)-F(3)   | 1.9(5)    |
| C(2)-C(3)-C(4)-F(3)   | -176.5(3) |
| F(3)-C(4)-C(5)-F(4)   | 0.4(6)    |
| C(3)-C(4)-C(5)-F(4)   | -176.1(3) |
| F(3)-C(4)-C(5)-C(6)   | 178.0(3)  |
| C(3)-C(4)-C(5)-C(6)   | 1.5(6)    |
| C(4)-C(5)-C(6)-C(7)   | 179.0(4)  |
| F(4)-C(5)-C(6)-C(7)   | -3.4(6)   |
| C(4)-C(5)-C(6)-C(1)   | -4.8(6)   |
| F(4)-C(5)-C(6)-C(1)   | 172.7(3)  |
| C(2)-C(1)-C(6)-C(5)   | 6.1(5)    |
| Co(1)-C(1)-C(6)-C(5)  | -172.2(3) |
| C(2)-C(1)-C(6)-C(7)   | -177.2(3) |
| Co(1)-C(1)-C(6)-C(7)  | 4.5(4)    |
| C(5)-C(6)-C(7)-O(1)   | 167.5(4)  |
| C(1)-C(6)-C(7)-O(1)   | -8.9(4)   |
| C(5)-C(6)-C(7)-C(8)   | -13.5(6)  |
| C(1)-C(6)-C(7)-C(8)   | 170.1(3)  |
| O(1)-C(7)-C(8)-C(9)   | 140.8(3)  |
| C(6)-C(7)-C(8)-C(9)   | -38.2(5)  |
| O(1)-C(7)-C(8)-C(13)  | -36.0(5)  |
| C(6)-C(7)-C(8)-C(13)  | 145.0(4)  |
| C(13)-C(8)-C(9)-C(10) | -1.5(5)   |

|                         |             |
|-------------------------|-------------|
| C(7)-C(8)-C(9)-C(10)    | -178.3(3)   |
| C(8)-C(9)-C(10)-C(11)   | -0.4(6)     |
| C(9)-C(10)-C(11)-C(12)  | 1.3(6)      |
| C(10)-C(11)-C(12)-C(13) | -0.1(6)     |
| C(11)-C(12)-C(13)-C(8)  | -1.8(6)     |
| C(9)-C(8)-C(13)-C(12)   | 2.6(5)      |
| C(7)-C(8)-C(13)-C(12)   | 179.5(3)    |
| C(2)-C(1)-Co(1)-O(1)    | -177.7(4)   |
| C(6)-C(1)-Co(1)-O(1)    | 0.2(2)      |
| C(2)-C(1)-Co(1)-P(3)    | 69.2(4)     |
| C(6)-C(1)-Co(1)-P(3)    | -112.9(2)   |
| C(2)-C(1)-Co(1)-P(1)    | -42.9(4)    |
| C(6)-C(1)-Co(1)-P(1)    | 135.0(2)    |
| C(2)-C(1)-Co(1)-P(2)    | -175.2(2)   |
| C(6)-C(1)-Co(1)-P(2)    | 2.7(6)      |
| C(6)-C(7)-O(1)-Co(1)    | 9.5(4)      |
| C(8)-C(7)-O(1)-Co(1)    | -169.6(2)   |
| C(1)-Co(1)-O(1)-C(7)    | -5.5(3)     |
| P(3)-Co(1)-O(1)-C(7)    | 82.8(2)     |
| P(1)-Co(1)-O(1)-C(7)    | -94.5(3)    |
| P(2)-Co(1)-O(1)-C(7)    | 175.2(2)    |
| O(1)-Co(1)-P(1)-C(15)   | -173.9(2)   |
| C(1)-Co(1)-P(1)-C(15)   | 102.3(2)    |
| P(3)-Co(1)-P(1)-C(15)   | 8.85(19)    |
| P(2)-Co(1)-P(1)-C(15)   | -89.60(19)  |
| O(1)-Co(1)-P(1)-C(16)   | -54.2(2)    |
| C(1)-Co(1)-P(1)-C(16)   | -138.0(2)   |
| P(3)-Co(1)-P(1)-C(16)   | 128.52(19)  |
| P(2)-Co(1)-P(1)-C(16)   | 30.07(19)   |
| O(1)-Co(1)-P(1)-C(14)   | 64.2(2)     |
| C(1)-Co(1)-P(1)-C(14)   | -19.7(2)    |
| P(3)-Co(1)-P(1)-C(14)   | -113.11(18) |
| P(2)-Co(1)-P(1)-C(14)   | 148.44(18)  |
| O(1)-Co(1)-P(2)-C(22)   | 55.78(18)   |
| C(1)-Co(1)-P(2)-C(22)   | 53.3(4)     |
| P(3)-Co(1)-P(2)-C(22)   | 168.33(16)  |

|                       |            |
|-----------------------|------------|
| P(1)-Co(1)-P(2)-C(22) | -78.91(16) |
| O(1)-Co(1)-P(2)-C(20) | 179.5(2)   |
| C(1)-Co(1)-P(2)-C(20) | 177.0(4)   |
| P(3)-Co(1)-P(2)-C(20) | -67.90(19) |
| P(1)-Co(1)-P(2)-C(20) | 44.86(18)  |
| O(1)-Co(1)-P(2)-C(21) | -56.25(18) |
| C(1)-Co(1)-P(2)-C(21) | -58.8(4)   |
| P(3)-Co(1)-P(2)-C(21) | 56.30(17)  |
| P(1)-Co(1)-P(2)-C(21) | 169.06(17) |
| O(1)-Co(1)-P(3)-C(17) | -118.2(2)  |
| C(1)-Co(1)-P(3)-C(17) | -35.9(2)   |
| P(1)-Co(1)-P(3)-C(17) | 59.7(2)    |
| P(2)-Co(1)-P(3)-C(17) | 158.6(2)   |
| O(1)-Co(1)-P(3)-C(18) | 116.6(2)   |
| C(1)-Co(1)-P(3)-C(18) | -161.1(2)  |
| P(1)-Co(1)-P(3)-C(18) | -65.5(2)   |
| P(2)-Co(1)-P(3)-C(18) | 33.5(2)    |
| O(1)-Co(1)-P(3)-C(19) | -1.8(2)    |
| C(1)-Co(1)-P(3)-C(19) | 80.5(2)    |
| P(1)-Co(1)-P(3)-C(19) | 176.10(19) |
| P(2)-Co(1)-P(3)-C(19) | -84.97(19) |

---

Symmetry transformations used to generate equivalent atoms:

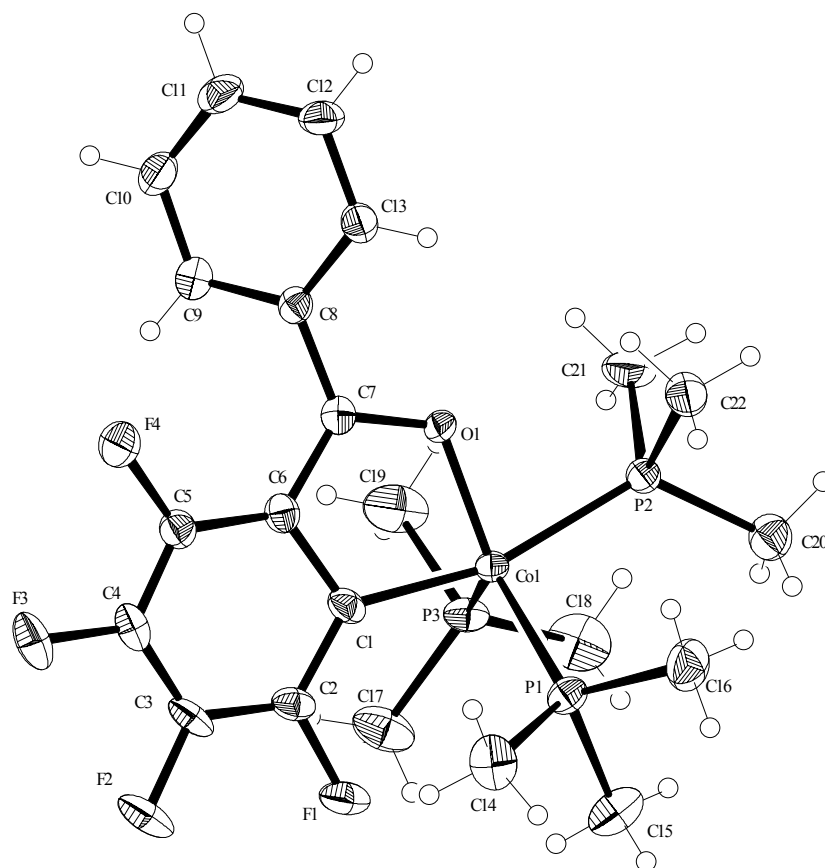

Molecular structure of **3**.

**Table 1.** Crystal data and structure refinement for **4**.

|                                   |                                                       |                   |
|-----------------------------------|-------------------------------------------------------|-------------------|
| Identification code               | 4                                                     |                   |
| Empirical formula                 | C <sub>22</sub> H <sub>36</sub> Co F O P <sub>3</sub> |                   |
| Formula weight                    | 487.35                                                |                   |
| Temperature                       | 150(2) K                                              |                   |
| Wavelength                        | 0.71073 Å                                             |                   |
| Crystal system                    | Monoclinic                                            |                   |
| Space group                       | P2 <sub>1</sub> /n                                    |                   |
| Unit cell dimensions              | a = 9.7220(12) Å                                      | α = 90.000(12)°.  |
|                                   | b = 17.1350(13) Å                                     | β = 101.030(12)°. |
|                                   | c = 15.4390(11) Å                                     | γ = 90.000(12)°.  |
| Volume                            | 2524.4(4) Å <sup>3</sup>                              |                   |
| Z                                 | 4                                                     |                   |
| Density (calculated)              | 1.282 Mg/m <sup>3</sup>                               |                   |
| Absorption coefficient            | 0.887 mm <sup>-1</sup>                                |                   |
| F(000)                            | 1028                                                  |                   |
| Crystal size                      | 0.12 x 0.10 x 0.08 mm <sup>3</sup>                    |                   |
| Theta range for data collection   | 4.16 to 26.37°.                                       |                   |
| Index ranges                      | -12 ≤ h ≤ 12, -21 ≤ k ≤ 21, -19 ≤ l ≤ 19              |                   |
| Reflections collected             | 30970                                                 |                   |
| Independent reflections           | 5112 [R(int) = 0.1130]                                |                   |
| Completeness to theta = 26.37°    | 99.0 %                                                |                   |
| Absorption correction             | Semi-empirical from equivalents                       |                   |
| Max. and min. transmission        | 0.9324 and 0.9010                                     |                   |
| Refinement method                 | Full-matrix least-squares on F <sup>2</sup>           |                   |
| Data / restraints / parameters    | 5112 / 0 / 253                                        |                   |
| Goodness-of-fit on F <sup>2</sup> | 1.048                                                 |                   |
| Final R indices [I > 2σ(I)]       | R1 = 0.0450, wR2 = 0.1153                             |                   |
| R indices (all data)              | R1 = 0.0522, wR2 = 0.1191                             |                   |
| Largest diff. peak and hole       | 0.717 and -1.107 e.Å <sup>-3</sup>                    |                   |

**Table 2.** Atomic coordinates ( $\times 10^4$ ) and equivalent isotropic displacement parameters ( $\text{\AA}^2 \times 10^3$ ) for **4**.  $U(\text{eq})$  is defined as one third of the trace of the orthogonalized  $U^{ij}$  tensor.

|       | x       | y       | z       | $U(\text{eq})$ |
|-------|---------|---------|---------|----------------|
| C(1)  | 6744(2) | 2556(1) | 4360(2) | 20(1)          |
| C(2)  | 7325(2) | 3323(1) | 4107(2) | 22(1)          |
| C(3)  | 7365(3) | 3577(1) | 3252(2) | 26(1)          |
| C(4)  | 7842(3) | 4305(2) | 3060(2) | 37(1)          |
| C(5)  | 8322(3) | 4818(2) | 3749(2) | 43(1)          |
| C(6)  | 8305(3) | 4595(2) | 4612(2) | 40(1)          |
| C(7)  | 7816(3) | 3860(2) | 4784(2) | 30(1)          |
| C(8)  | 7479(2) | 1807(1) | 4212(2) | 22(1)          |
| C(9)  | 8181(2) | 1674(1) | 3514(2) | 26(1)          |
| C(10) | 8777(3) | 950(2)  | 3400(2) | 32(1)          |
| C(11) | 8749(3) | 352(2)  | 3998(2) | 38(1)          |
| C(12) | 8106(3) | 485(2)  | 4714(2) | 40(1)          |
| C(13) | 7466(3) | 1194(2) | 4820(2) | 31(1)          |
| C(14) | 4211(3) | 4472(2) | 3960(2) | 40(1)          |
| C(15) | 3604(3) | 3703(2) | 2315(2) | 44(1)          |
| C(16) | 1692(3) | 3644(2) | 3458(2) | 39(1)          |
| C(17) | 3356(3) | 3155(2) | 5948(2) | 40(1)          |
| C(18) | 4153(3) | 1579(2) | 6033(2) | 40(1)          |
| C(19) | 1494(3) | 2009(2) | 5079(2) | 41(1)          |
| C(20) | 4727(3) | 1550(2) | 2213(2) | 46(1)          |
| C(21) | 4200(5) | 571(2)  | 3567(3) | 61(1)          |
| C(22) | 2077(3) | 1565(2) | 2656(2) | 53(1)          |
| Co(1) | 4637(1) | 2480(1) | 4214(1) | 17(1)          |
| F(1)  | 6844(2) | 3098(1) | 2548(1) | 35(1)          |
| O(1)  | 6248(2) | 2593(1) | 5113(1) | 23(1)          |
| P(1)  | 3934(1) | 1588(1) | 3196(1) | 26(1)          |
| P(2)  | 3332(1) | 2302(1) | 5230(1) | 23(1)          |
| P(3)  | 3582(1) | 3525(1) | 3493(1) | 26(1)          |

**Table 3.** Bond lengths [Å] and angles [°] for **4**.

---

|                |            |
|----------------|------------|
| C(1)-O(1)      | 1.343(3)   |
| C(1)-C(8)      | 1.507(3)   |
| C(1)-C(2)      | 1.511(3)   |
| C(1)-Co(1)     | 2.022(2)   |
| C(2)-C(3)      | 1.397(3)   |
| C(2)-C(7)      | 1.406(3)   |
| C(3)-F(1)      | 1.378(3)   |
| C(3)-C(4)      | 1.382(3)   |
| C(4)-C(5)      | 1.390(4)   |
| C(5)-C(6)      | 1.390(5)   |
| C(6)-C(7)      | 1.389(4)   |
| C(8)-C(9)      | 1.401(3)   |
| C(8)-C(13)     | 1.410(3)   |
| C(9)-C(10)     | 1.394(3)   |
| C(10)-C(11)    | 1.383(4)   |
| C(11)-C(12)    | 1.389(4)   |
| C(12)-C(13)    | 1.388(4)   |
| C(14)-P(3)     | 1.834(3)   |
| C(15)-P(3)     | 1.849(3)   |
| C(16)-P(3)     | 1.839(3)   |
| C(17)-P(2)     | 1.832(3)   |
| C(18)-P(2)     | 1.825(3)   |
| C(19)-P(2)     | 1.828(3)   |
| C(20)-P(1)     | 1.831(3)   |
| C(21)-P(1)     | 1.838(3)   |
| C(22)-P(1)     | 1.838(3)   |
| Co(1)-O(1)     | 1.8938(17) |
| Co(1)-P(1)     | 2.2043(7)  |
| Co(1)-P(2)     | 2.2189(7)  |
| Co(1)-P(3)     | 2.2492(7)  |
| O(1)-C(1)-C(8) | 115.47(19) |
| O(1)-C(1)-C(2) | 113.38(18) |
| C(8)-C(1)-C(2) | 119.35(19) |

|                   |            |
|-------------------|------------|
| O(1)-C(1)-Co(1)   | 64.87(12)  |
| C(8)-C(1)-Co(1)   | 115.33(15) |
| C(2)-C(1)-Co(1)   | 116.63(15) |
| C(3)-C(2)-C(7)    | 115.5(2)   |
| C(3)-C(2)-C(1)    | 126.5(2)   |
| C(7)-C(2)-C(1)    | 117.9(2)   |
| F(1)-C(3)-C(4)    | 117.1(2)   |
| F(1)-C(3)-C(2)    | 119.1(2)   |
| C(4)-C(3)-C(2)    | 123.7(2)   |
| C(3)-C(4)-C(5)    | 119.0(3)   |
| C(6)-C(5)-C(4)    | 119.7(2)   |
| C(7)-C(6)-C(5)    | 119.9(3)   |
| C(6)-C(7)-C(2)    | 122.1(3)   |
| C(9)-C(8)-C(13)   | 117.2(2)   |
| C(9)-C(8)-C(1)    | 124.7(2)   |
| C(13)-C(8)-C(1)   | 118.0(2)   |
| C(10)-C(9)-C(8)   | 121.1(2)   |
| C(11)-C(10)-C(9)  | 120.9(3)   |
| C(10)-C(11)-C(12) | 118.6(2)   |
| C(13)-C(12)-C(11) | 121.1(3)   |
| C(12)-C(13)-C(8)  | 120.9(2)   |
| O(1)-Co(1)-C(1)   | 39.93(8)   |
| O(1)-Co(1)-P(1)   | 133.91(5)  |
| C(1)-Co(1)-P(1)   | 107.07(7)  |
| O(1)-Co(1)-P(2)   | 90.04(5)   |
| C(1)-Co(1)-P(2)   | 129.36(7)  |
| P(1)-Co(1)-P(2)   | 105.51(3)  |
| O(1)-Co(1)-P(3)   | 121.06(5)  |
| C(1)-Co(1)-P(3)   | 111.11(7)  |
| P(1)-Co(1)-P(3)   | 98.60(3)   |
| P(2)-Co(1)-P(3)   | 100.99(3)  |
| C(1)-O(1)-Co(1)   | 75.20(13)  |
| C(20)-P(1)-C(21)  | 99.70(18)  |
| C(20)-P(1)-C(22)  | 98.99(16)  |
| C(21)-P(1)-C(22)  | 100.90(18) |
| C(20)-P(1)-Co(1)  | 119.53(10) |



Supplementary Material (ESI) for Dalton Transactions  
This journal is (c) The Royal Society of Chemistry 2008

|                  |            |
|------------------|------------|
| C(21)-P(1)-Co(1) | 115.43(11) |
| C(22)-P(1)-Co(1) | 118.78(10) |
| C(18)-P(2)-C(19) | 100.95(14) |
| C(18)-P(2)-C(17) | 100.20(15) |
| C(19)-P(2)-C(17) | 101.23(14) |
| C(18)-P(2)-Co(1) | 109.79(9)  |
| C(19)-P(2)-Co(1) | 128.69(10) |
| C(17)-P(2)-Co(1) | 112.07(10) |
| C(14)-P(3)-C(16) | 99.78(14)  |
| C(14)-P(3)-C(15) | 100.03(16) |
| C(16)-P(3)-C(15) | 98.80(14)  |
| C(14)-P(3)-Co(1) | 115.10(10) |
| C(16)-P(3)-Co(1) | 117.47(10) |
| C(15)-P(3)-Co(1) | 121.87(10) |

---

Symmetry transformations used to generate equivalent atoms:

**Table 4.** Anisotropic displacement parameters ( $\text{\AA}^2 \times 10^3$ ) for **4**. The anisotropic displacement factor exponent takes the form:  $-2\pi^2 [ h^2 a^{*2} U^{11} + \dots + 2 h k a^* b^* U^{12} ]$

|       | $U^{11}$ | $U^{22}$ | $U^{33}$ | $U^{23}$ | $U^{13}$ | $U^{12}$ |
|-------|----------|----------|----------|----------|----------|----------|
| C(1)  | 19(1)    | 23(1)    | 18(1)    | 0(1)     | 1(1)     | -2(1)    |
| C(2)  | 19(1)    | 23(1)    | 25(1)    | 1(1)     | 6(1)     | -1(1)    |
| C(3)  | 26(1)    | 26(1)    | 29(1)    | -1(1)    | 11(1)    | 3(1)     |
| C(4)  | 43(2)    | 28(1)    | 48(2)    | 10(1)    | 28(1)    | 7(1)     |
| C(5)  | 42(2)    | 21(1)    | 75(2)    | 3(1)     | 32(2)    | -5(1)    |
| C(6)  | 32(2)    | 31(1)    | 60(2)    | -15(1)   | 16(1)    | -10(1)   |
| C(7)  | 25(1)    | 32(1)    | 32(1)    | -6(1)    | 5(1)     | -7(1)    |
| C(8)  | 16(1)    | 23(1)    | 24(1)    | 1(1)     | -2(1)    | -1(1)    |
| C(9)  | 20(1)    | 26(1)    | 31(1)    | -1(1)    | 3(1)     | 0(1)     |
| C(10) | 23(1)    | 32(1)    | 40(2)    | -8(1)    | 4(1)     | 3(1)     |
| C(11) | 28(1)    | 26(1)    | 55(2)    | -6(1)    | -3(1)    | 7(1)     |
| C(12) | 36(2)    | 29(1)    | 52(2)    | 12(1)    | 3(1)     | 6(1)     |
| C(13) | 29(1)    | 32(1)    | 32(1)    | 8(1)     | 5(1)     | 2(1)     |
| C(14) | 40(2)    | 24(1)    | 56(2)    | 1(1)     | 9(1)     | 5(1)     |
| C(15) | 44(2)    | 56(2)    | 32(2)    | 16(1)    | 7(1)     | 21(1)    |
| C(16) | 32(2)    | 42(2)    | 40(2)    | -1(1)    | 3(1)     | 12(1)    |
| C(17) | 48(2)    | 43(2)    | 31(1)    | -8(1)    | 14(1)    | -3(1)    |
| C(18) | 42(2)    | 44(2)    | 37(2)    | 15(1)    | 17(1)    | 4(1)     |
| C(19) | 27(2)    | 57(2)    | 41(2)    | -2(1)    | 11(1)    | -9(1)    |
| C(20) | 37(2)    | 66(2)    | 35(2)    | -27(1)   | 7(1)     | 0(1)     |
| C(21) | 87(3)    | 26(1)    | 62(2)    | -10(1)   | -5(2)    | -12(2)   |
| C(22) | 24(2)    | 69(2)    | 62(2)    | -35(2)   | -1(1)    | -6(1)    |
| Co(1) | 18(1)    | 18(1)    | 16(1)    | -1(1)    | 2(1)     | -1(1)    |
| F(1)  | 45(1)    | 37(1)    | 26(1)    | 3(1)     | 9(1)     | 5(1)     |
| O(1)  | 21(1)    | 31(1)    | 15(1)    | -1(1)    | 1(1)     | -5(1)    |
| P(1)  | 22(1)    | 28(1)    | 28(1)    | -11(1)   | 1(1)     | -3(1)    |
| P(2)  | 23(1)    | 26(1)    | 22(1)    | -1(1)    | 7(1)     | -2(1)    |
| P(3)  | 26(1)    | 26(1)    | 24(1)    | 4(1)     | 3(1)     | 7(1)     |

**Table 5.** Hydrogen coordinates ( $\times 10^4$ ) and isotropic displacement parameters ( $\text{\AA}^2 \times 10^3$ )  
for **4**.

|        | x    | y    | z    | U(eq) |
|--------|------|------|------|-------|
| H(5A)  | 7840 | 4449 | 2479 | 44    |
| H(11A) | 8655 | 5309 | 3632 | 52    |
| H(7A)  | 8620 | 4938 | 5075 | 48    |
| H(6A)  | 7813 | 3719 | 5365 | 36    |
| H(2A)  | 8251 | 2076 | 3119 | 31    |
| H(4A)  | 9199 | 868  | 2916 | 38    |
| H(9A)  | 9152 | -129 | 3922 | 45    |
| H(12A) | 8103 | 92   | 5130 | 48    |
| H(10A) | 7024 | 1265 | 5297 | 37    |
| H(15A) | 5194 | 4521 | 3956 | 48    |
| H(15B) | 4061 | 4509 | 4555 | 48    |
| H(15C) | 3709 | 4883 | 3612 | 48    |
| H(18C) | 3102 | 4175 | 2128 | 53    |
| H(18B) | 3166 | 3273 | 1969 | 53    |
| H(18A) | 4556 | 3753 | 2236 | 53    |
| H(13A) | 1521 | 3684 | 4049 | 46    |
| H(13B) | 1199 | 3200 | 3172 | 46    |
| H(13C) | 1368 | 4109 | 3136 | 46    |
| H(21A) | 3002 | 3601 | 5599 | 48    |
| H(21B) | 4300 | 3255 | 6246 | 48    |
| H(21C) | 2779 | 3055 | 6376 | 48    |
| H(14A) | 5066 | 1758 | 6311 | 48    |
| H(14B) | 4238 | 1093 | 5738 | 48    |
| H(14C) | 3586 | 1505 | 6471 | 48    |
| H(22C) | 1219 | 1982 | 5644 | 50    |
| H(22B) | 1376 | 1507 | 4800 | 50    |
| H(22A) | 921  | 2385 | 4715 | 50    |
| H(16A) | 5718 | 1466 | 2387 | 55    |
| H(16B) | 4562 | 2035 | 1898 | 55    |

Supplementary Material (ESI) for Dalton Transactions  
This journal is (c) The Royal Society of Chemistry 2008

|        |      |      |      |    |
|--------|------|------|------|----|
| H(16C) | 4318 | 1130 | 1839 | 55 |
| H(19A) | 3696 | 476  | 4034 | 73 |
| H(19B) | 5181 | 479  | 3779 | 73 |
| H(19C) | 3863 | 226  | 3083 | 73 |
| H(17C) | 1927 | 1150 | 2232 | 64 |
| H(17B) | 1827 | 2054 | 2363 | 64 |
| H(17A) | 1508 | 1481 | 3092 | 64 |

---

**Table 6.** Torsion angles [°] for **4**.

---

|                         |           |
|-------------------------|-----------|
| O(1)-C(1)-C(2)-C(3)     | -151.2(2) |
| C(8)-C(1)-C(2)-C(3)     | 67.5(3)   |
| Co(1)-C(1)-C(2)-C(3)    | -78.7(3)  |
| O(1)-C(1)-C(2)-C(7)     | 25.4(3)   |
| C(8)-C(1)-C(2)-C(7)     | -115.9(2) |
| Co(1)-C(1)-C(2)-C(7)    | 97.9(2)   |
| C(7)-C(2)-C(3)-F(1)     | -177.1(2) |
| C(1)-C(2)-C(3)-F(1)     | -0.5(4)   |
| C(7)-C(2)-C(3)-C(4)     | -0.3(4)   |
| C(1)-C(2)-C(3)-C(4)     | 176.3(2)  |
| F(1)-C(3)-C(4)-C(5)     | 177.4(2)  |
| C(2)-C(3)-C(4)-C(5)     | 0.6(4)    |
| C(3)-C(4)-C(5)-C(6)     | -0.6(4)   |
| C(4)-C(5)-C(6)-C(7)     | 0.4(4)    |
| C(5)-C(6)-C(7)-C(2)     | -0.2(4)   |
| C(3)-C(2)-C(7)-C(6)     | 0.2(4)    |
| C(1)-C(2)-C(7)-C(6)     | -176.8(2) |
| O(1)-C(1)-C(8)-C(9)     | -174.0(2) |
| C(2)-C(1)-C(8)-C(9)     | -33.4(3)  |
| Co(1)-C(1)-C(8)-C(9)    | 113.2(2)  |
| O(1)-C(1)-C(8)-C(13)    | 5.9(3)    |
| C(2)-C(1)-C(8)-C(13)    | 146.5(2)  |
| Co(1)-C(1)-C(8)-C(13)   | -66.9(3)  |
| C(13)-C(8)-C(9)-C(10)   | 3.3(3)    |
| C(1)-C(8)-C(9)-C(10)    | -176.8(2) |
| C(8)-C(9)-C(10)-C(11)   | -3.0(4)   |
| C(9)-C(10)-C(11)-C(12)  | 0.4(4)    |
| C(10)-C(11)-C(12)-C(13) | 1.8(4)    |
| C(11)-C(12)-C(13)-C(8)  | -1.5(4)   |
| C(9)-C(8)-C(13)-C(12)   | -1.1(4)   |
| C(1)-C(8)-C(13)-C(12)   | 179.0(2)  |
| C(8)-C(1)-Co(1)-O(1)    | 107.7(2)  |
| C(2)-C(1)-Co(1)-O(1)    | -104.8(2) |

|                       |             |
|-----------------------|-------------|
| O(1)-C(1)-Co(1)-P(1)  | -139.76(10) |
| C(8)-C(1)-Co(1)-P(1)  | -32.09(18)  |
| C(2)-C(1)-Co(1)-P(1)  | 115.46(16)  |
| O(1)-C(1)-Co(1)-P(2)  | -11.90(14)  |
| C(8)-C(1)-Co(1)-P(2)  | 95.77(17)   |
| C(2)-C(1)-Co(1)-P(2)  | -116.68(15) |
| O(1)-C(1)-Co(1)-P(3)  | 113.61(10)  |
| C(8)-C(1)-Co(1)-P(3)  | -138.72(15) |
| C(2)-C(1)-Co(1)-P(3)  | 8.83(18)    |
| C(8)-C(1)-O(1)-Co(1)  | -107.45(18) |
| C(2)-C(1)-O(1)-Co(1)  | 109.66(18)  |
| P(1)-Co(1)-O(1)-C(1)  | 59.00(13)   |
| P(2)-Co(1)-O(1)-C(1)  | 170.83(11)  |
| P(3)-Co(1)-O(1)-C(1)  | -86.29(12)  |
| O(1)-Co(1)-P(1)-C(20) | -76.02(15)  |
| C(1)-Co(1)-P(1)-C(20) | -40.89(15)  |
| P(2)-Co(1)-P(1)-C(20) | 178.42(13)  |
| P(3)-Co(1)-P(1)-C(20) | 74.42(13)   |
| O(1)-Co(1)-P(1)-C(21) | 42.90(18)   |
| C(1)-Co(1)-P(1)-C(21) | 78.04(17)   |
| P(2)-Co(1)-P(1)-C(21) | -62.65(16)  |
| P(3)-Co(1)-P(1)-C(21) | -166.66(16) |
| O(1)-Co(1)-P(1)-C(22) | 162.91(17)  |
| C(1)-Co(1)-P(1)-C(22) | -161.95(17) |
| P(2)-Co(1)-P(1)-C(22) | 57.36(15)   |
| P(3)-Co(1)-P(1)-C(22) | -46.65(15)  |
| O(1)-Co(1)-P(2)-C(18) | -48.67(12)  |
| C(1)-Co(1)-P(2)-C(18) | -41.06(14)  |
| P(1)-Co(1)-P(2)-C(18) | 87.38(12)   |
| P(3)-Co(1)-P(2)-C(18) | -170.39(11) |
| O(1)-Co(1)-P(2)-C(19) | -171.81(15) |
| C(1)-Co(1)-P(2)-C(19) | -164.20(16) |
| P(1)-Co(1)-P(2)-C(19) | -35.76(14)  |
| P(3)-Co(1)-P(2)-C(19) | 66.47(14)   |
| O(1)-Co(1)-P(2)-C(17) | 61.75(12)   |
| C(1)-Co(1)-P(2)-C(17) | 69.36(14)   |

|                       |             |
|-----------------------|-------------|
| P(1)-Co(1)-P(2)-C(17) | -162.20(11) |
| P(3)-Co(1)-P(2)-C(17) | -59.97(12)  |
| O(1)-Co(1)-P(3)-C(14) | -9.60(13)   |
| C(1)-Co(1)-P(3)-C(14) | -52.96(13)  |
| P(1)-Co(1)-P(3)-C(14) | -165.08(11) |
| P(2)-Co(1)-P(3)-C(14) | 87.17(12)   |
| O(1)-Co(1)-P(3)-C(16) | -126.66(12) |
| C(1)-Co(1)-P(3)-C(16) | -170.02(13) |
| P(1)-Co(1)-P(3)-C(16) | 77.86(11)   |
| P(2)-Co(1)-P(3)-C(16) | -29.90(11)  |
| O(1)-Co(1)-P(3)-C(15) | 111.59(15)  |
| C(1)-Co(1)-P(3)-C(15) | 68.23(16)   |
| P(1)-Co(1)-P(3)-C(15) | -43.89(14)  |
| P(2)-Co(1)-P(3)-C(15) | -151.64(14) |

---

Symmetry transformations used to generate equivalent atoms:

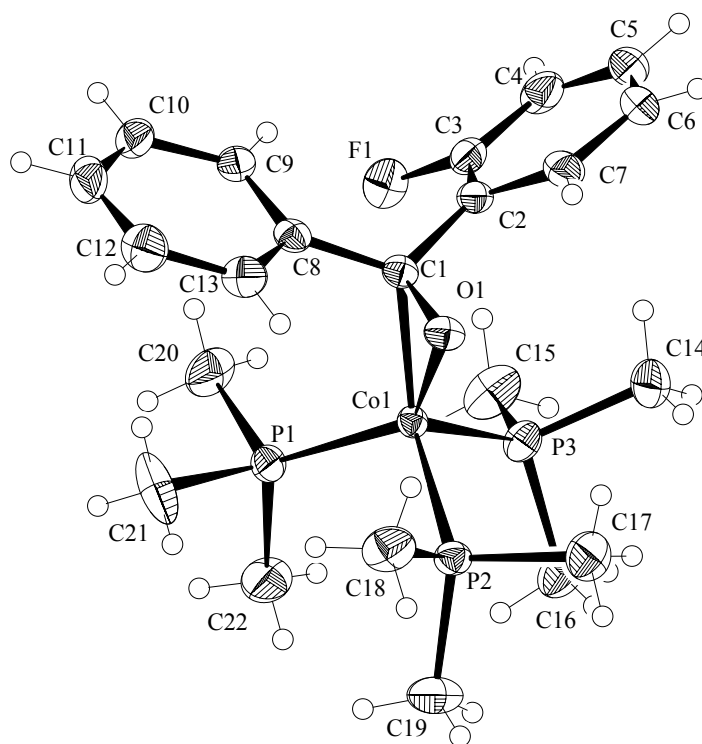

Molecular structure of **4**.
